# Supplementary material for: Meloxicam Inhibits Hepatocellular Carcinoma Progression and Enhances the Sensitivity of Immunotherapy via the MicroRNA-200/PD-L1 Pathway
Source: Hindawi journal article supplement (doi:10.1155/2022/4598573), 2022-02-21
Supplement: f1 [file 4598573.f1.pdf]

Supplementary Table 1 Drug names from selleck drug library approved by FDA

|                         |                                    |                       |                          |                        |                               |                        |                                |                       |               |                |
|-------------------------|------------------------------------|-----------------------|--------------------------|------------------------|-------------------------------|------------------------|--------------------------------|-----------------------|---------------|----------------|
| S4656                   | S1214                              | S5325                 | S3747                    | S5004                  | S2596                         | S1005                  | S8041                          | S4820                 | S5776         | S1646          |
| Parecoxib               | Bleomycin sulfate                  | Nitisinone            | Levothyroxine sodium     | Pimecrolimus           | Clindamycin palmitate HCl     | Axitinib               | Cobimetinib (GDC-0973, RG7420) | Diastase              | Proflavine    | Ketorolac      |
| S4657                   | S1218                              | S5326                 | S3750                    | S5005                  | S2599                         | S1007                  | S8048                          | S4830                 | S5778         | S1647          |
| Eslicarbazepine Acetate | Clofarabine                        | Dolasetron            | Sodium benzoate          | Cefotiam hydrochloride | L-Thyroxine                   | Roxadustat (FG-4592)   | Venetoclax (ABT-199, GDC-0199) | Maltose               | Esmolol       | Adenosine      |
| S4658                   | S1221                              | S5327                 | S3751                    | S5006                  | S2601                         | S1010                  | S8051                          | S4831                 | S5779         | S1649          |
| Hydroquinidine          | Dacarbazine                        | Meisoindigo           | Quinidine sulfate        | Teprenone              | Gliclazide                    | Nintedanib (BIBF 1120) | Macitentan                     | Piperonyl butoxide    | Trimetazidine | Zolmitriptan   |
| S4660                   | S1222                              | S5328                 | S3754                    | S5007                  | S2602                         | S1011                  | S8067                          | S4832                 | S5780         | S1651          |
| Glycopyrrolate          | Dexrazoxan HCl (ICRF-187, ADR-529) | Gamithromycin         | 4-Hydroxybenzoic acid    | Delamanid              | Acemetacin                    | Afatinib (BIBW2992)    | Vorapaxar                      | Tolmetin              | Prazosin      | Telbivudine    |
| S4661                   | S3061                              | S5331                 | S3755                    | S5009                  | S2603                         | S1013                  | S8101                          | S4833                 | S5781         | S1652          |
| Tiagabine hydrochloride | Epinephrine HCl                    | Ceftazidime sodium    | Betaine                  | Brivudine              | Tioxolone                     | Bortezomib (PS-341)    | CB-5083                        | Cefoxitin sodium      | Raloxifene    | Monobenzene    |
| S4662                   | S3062                              | S5333                 | S3756                    | S5010                  | S2604                         | S1014                  | S8116                          | S4834                 | S5782         | S1653          |
| Atazanavir              | Diclofenac Potassium               | Sulbenicillin Sodium  | Methyl salicylate        | Indometacin Sodium     | Dehydroepiandrosterone (DHEA) | Bosutinib (SKI-606)    | Acalabrutinib (ACP-196)        | Propantheline bromide | Doxazosin     | Tretinoin      |
| S4663                   | S3063                              | S5341                 | S3758                    | Empty                  | S2605                         | S1021                  | S8133                          | S4835                 | S5783         | S1654          |
| Fusidate Sodium         | Diclofenac Diethylamine            | Metroprolol succinate | Sinomenine hydrochloride | Empty                  | Idebenone                     | Dasatinib              | Resiquimod                     | Aceclofenac           | Montelukast   | Phenylbutazone |

| e                              |                    |                      |                                   |                            |                |                                      |                         |                          |                          |                       |
|--------------------------------|--------------------|----------------------|-----------------------------------|----------------------------|----------------|--------------------------------------|-------------------------|--------------------------|--------------------------|-----------------------|
| S4664                          | S3066              | S5343                | S3761                             | S5012                      | S2606          | S1022                                | S8134                   | S4836                    | S5784                    | S1655                 |
| Molsidomine                    | Naloxone HCl       | Vanillic acid        | Eucalyptol                        | Octenidine Dihydrochloride | Mifepristone   | Ridaforolimus (Deforolimus, MK-8669) | Radotinib               | Nilutamide               | Vancomycin               | Ezetimibe             |
| S4665                          | S3067              | S5345                | S3763                             | S5013                      | S2607          | S1025                                | S8135                   | S4837                    | S5787                    | S1657                 |
| Rebeprazole sodium             | Chlorhexidine?2HCl | Nerolidol            | Cinnamaldehyde                    | Ioversol                   | Buflomedil HCl | Gefitinib (ZD1839)                   | Riociguat (BAY 63-2521) | Ibudilast                | Dronedarone              | Enalaprilat Dihydrate |
| S4666                          | S3070              | S5350                | S3766                             | S5014                      | S2608          | S1026                                | S8136                   | S4838                    | S5795                    | S1658                 |
| Sivelestat sodium tetrahydrate | Piracetam          | Cefpodoxime proxetil | Tanshinone IIA sulfonate (sodium) | Crisaborole (AN2728)       | Fluocinonide   | Imatinib Mesylate (STI571)           | Sivelestat (ONO-5046)   | Acotiamide hydrochloride | Rasagiline               | Dofetilide            |
| S4667                          | S3071              | S5351                | S3769                             | S5015                      | S2609          | S1028                                | S8144                   | S4839                    | S5802                    | S1662                 |
| Lidocaine hydrochloride        | Vanillin           | Cefmetazole sodium   | Palmitate                         | Simeprevir                 | Inulin         | Lapatinib (GW-572016) Ditosylate     | Halofuginone            | Mosapride                | Alprenolol hydrochloride | Isradipine            |
| S4668                          | S3074              | S5352                | S3772                             | S5016                      | S2610          | S1029                                | S8146                   | S4841                    | S5805                    | S1665                 |
| Procaine                       | Chlorthalidone     | Cefminox Sodium      | 5-Hydroxymethylfurfural           | Isoprinosine               | Lonidamine     | Lenalidomide (CC-5013)               | Mitomycin C             | Laurocapram              | Allopregnanolone         | Estrone               |
| S4669                          | S3075              | S5353                | S3773                             | S5017                      | S2613          | S1030                                | S8183                   | S4843                    | S5808                    | S1666                 |
| Benzocaine hydrochloride       | Dexmedetomidine    | Cefpiramide sodium   | Tyrosol                           | Oxyclozanide               | Clorsulon      | Panobinostat (LBH589)                | Pimavanserin            | Potassium acetate        | Relugolix                | Flucytosine           |
| S4673                          | Empty              | S5356                | S3775                             | S5019                      | S2614          | S1033                                | S8195                   | S4844                    | S5812                    | S1667                 |

|                              |                             |              |                            |                          |                                      |                                    |                                 |                                 |                               |                       |
|------------------------------|-----------------------------|--------------|----------------------------|--------------------------|--------------------------------------|------------------------------------|---------------------------------|---------------------------------|-------------------------------|-----------------------|
| Etonogestrel                 |                             | Ceftiofur    | Ligustrazine hydrochloride | Indobufen                | Arecoline HBr                        | Nilotinib (AMN-107)                | Oclacitinib?maleate             | Cefcapene Pivoxil Hydrochloride | Choline Fenofibrate           | Trichlormethiazide    |
| S4674                        | S3077                       | S5357        | S3779                      | S5020                    | S2615                                | S1035                              | S8205                           | S4845                           | S5816                         | S1669                 |
| Hydroxyprogesterone caproate | Tazobactam                  | Safinamide   | cis-Anethole               | Tilorone dihydrochloride | Noradrenaline bitartrate monohydrate | Pazopanib HCl (GW786034 HCl)       | Enasidenib (AG-221)             | Rabeprazole                     | pyrvinium                     | Loteprednol etabonate |
| S4675                        | S3078                       | S5358        | S3781                      | S5023                    | S2625                                | S1039                              | S8206                           | S4846                           | S5821                         |                       |
| Tiagabine                    | Beclomethasone dipropionate | Regadenoson  | Ginkgolide C               | Nadolol                  | Fostamatinib (R788)                  | Rapamycin (Sirolimus)              | Ivosidenib (AG-120)             | Meropenem Trihydrate            | Linoleic acid                 | Empty                 |
| S4676                        | S3079                       | S5359        | S3783                      | S5025                    | S2664                                | S1040                              | S8266                           | S4847                           | S5827                         | S1672                 |
| Gluconolactone               | Atovaquone                  | Butoconazole | Echinacoside               | Efinaconazole            | Clinofibrate                         | Sorafenib Tosylate                 | Melphalan                       | Faropenem Sodium                | Citronellyl acetate           | Aminoglutethimide     |
| S4678                        | S3080                       | S5360        | S3785                      | S5027                    | S2665                                | S1042                              | S8294                           | S4848                           | S5842                         | S1673                 |
| Povidone iodine              | Etravirine (TMC125)         | Diflorasone  | Notoginsenoside R1         | Mebeverine Hydrochloride | Ciprofibrate                         | Sunitinib Malate                   | Olmutinib (HM61713, BI 1482694) | Dalbavancin                     | Cabergoline                   | Aminophylline         |
| S4679                        | S3081                       | S5361        | S3788                      | S5028                    | S2667                                | S1044                              | S8401                           | S4849                           | S5843                         | S1675                 |
| Terazosin HCl                | Ulipristal                  | Bendazac     | Carvacrol                  | 4-Aminopyridine          | Dolutegravir (GSK1349572)            | Temsirolimus (CCI-779, NSC 683864) | Erdafitinib (JNJ-42756493)      | Levocetirizine Dihydrochloride  | Cinitapride Hydrogen Tartrate | Lubiprostone          |
| S4680                        | S3083                       | S5363        | S3791                      | S5029                    | S2673                                | S1047                              | S8432                           | S4850                           | S5858                         | S1676                 |

|                     |                     |              |                            |                          |                         |                                                  |                              |                           |                        |                     |
|---------------------|---------------------|--------------|----------------------------|--------------------------|-------------------------|--------------------------------------------------|------------------------------|---------------------------|------------------------|---------------------|
| Protirelin          | Indacaterol Maleate | Pikamilone   | Succinic acid              | Etofylline               | Trametinib (GSK1120212) | Vorinostat (SAHA, MK0683)                        | Troglitazone (CS-045)        | Flucloxacillin sodium     | Vilazodone             | Amorolfine HCl      |
| S4682               | S3100               | S5365        | S3794                      | S5030                    | S2680                   | S1053                                            | S8539                        | S4851                     | S5861                  | S1677               |
| Loxoprofen          | 2-Thiouracil        | Alogliptin   | Palmitic acid              | Dihydralazine sulphate   | Ibrutinib (PCI-32765)   | Entinostat (MS-275)                              | TAS-102                      | Tafluprost                | Lercanidipine          | Chloramphenicol     |
| S4683               | S3104               | S5366        | S3802                      | S5032                    | S2721                   | S1055                                            | S8558                        | S4852                     | S5862                  | S1679               |
| Sildenafil Mesylate | Moguisteine         | Fipronil     | Trigonelline Hydrochloride | Mephenesin               | Nilvadipine             | Enzastaurin (LY317615)                           | Tofogliflozin(CSG 452)       | Gadopentetate Dimeglumine | Metoclopramide         | Flurbiprofen        |
| S4685               | S3105               | S5367        | S3805                      | S5033                    | S2727                   | S1060                                            | S8565                        | S4853                     | S5863                  | S1680               |
| Efavirenz           | Nadifloxacin        | Ethyl Oleate | Stevioside                 | Terconazole              | (PF299804, PF299)       | Dacomitinib<br>Olaparib<br>(AZD2281, Ku-0059436) | Omarigliptin<br>(MK-3102)    | Ecabet sodium             | Metronidazole Benzoate | Disulfiram          |
| S4686               | S3106               | S5368        | S3807                      | S5034                    | S2741                   | S1064                                            | S8567                        | S4854                     | Empty                  | S1681               |
| Vitamin E           | Pidotimod           | Lactitol     | Dehydroandrographolide     | Melitracen hydrochloride | Niraparib (MK-4827)     | Masitinib (AB1010)                               | Tucidinostat (Chidamide)     | Bedaquiline fumarate      |                        | Mesalamine          |
| S4687               | S3113               | S5369        | S3809                      | S5037                    | S2760                   | S1068                                            | S8594                        | S4856                     | S5869                  | S1683               |
| Rivastigmine        | Pyridoxine HCl      | Ethoxyquin   | Imperatorin                | Phenazine methosulfate   | Canagliflozin           | Crizotinib (PF-02341066)                         | Tirofiban Hydrochloride      | Iproniazid                | Cortisone              | Ipratropium Bromide |
| S4689               | S3114               | S5371        | S3810                      | S5038                    | S2762                   | S1082                                            | S8615                        | S4859                     | S5871                  | S1685               |
| Deoxycholic acid    | Vitamin C           | Ajmaline     | Scutellarin                | Valethamate Bromide      | Alectinib (CH5424802)   | Vismodegib (GDC-0449)                            | Sodium dichloroacetate (DCA) | TriacetonaMine            | Trans-Tranilast        | Sulfanilamide       |
| S4690               | S3116               | S5372        | S3811                      | S5039                    | S2765                   | S1085                                            | S8637                        | S4860                     | S5872                  | S1688               |

|                          |                       |                                      |                       |                          |                                      |                                             |                                    |                                 |                                                             |                            |
|--------------------------|-----------------------|--------------------------------------|-----------------------|--------------------------|--------------------------------------|---------------------------------------------|------------------------------------|---------------------------------|-------------------------------------------------------------|----------------------------|
| Escin                    | Sulfathiazole         | Methyl Aminolevulinate Hydrochloride | Ginsenoside Re        | Actarit                  | MK-2048                              | Belinostat (PXD101)                         | Ipragliflozin (ASP1941)            | Indole-3-carboxylic acid        | Estradiol dipropionate(17-Beta-Estradiol-3,17-Dipropionate) | Betamethasone Dipropionate |
| S4691                    | S3117                 | S5377                                | S3817                 | S5040                    | S2787                                | S1098                                       | S8726                              | S4862                           | S5873                                                       | S1689                      |
| Oxybenzone               | Oxybutynin chloride   | Dibutyl phthalate                    | Harmine hydrochloride | Tiamulin                 | Laquinimod                           | Rucaparib (AG-014699,PF-01367338) phosphate | Anlotinib (AL3818) dihydrochloride | Squalene                        | Scopolamine HBr trihydrate                                  | Meprednisone               |
| S4693                    | S3120                 | S5378                                | S3824                 | S5041                    | S2789                                | S1119                                       | S9001                              | S4865                           | S5874                                                       | S1690                      |
| Guanfacine Hydrochloride | Doxepin HCl           | Dimethyl phthalate                   | Quercitrin            | Difloxacin hydrochloride | Tofacitinib (CP-690550, Tasocitinib) | Cabozantinib (XL184, BMS-907351)            | Malic acid                         | Cefetamet pivoxil hydrochloride | L-Carnitine hydrochloride                                   | Betamethasone Valerate     |
| S4695                    | S3121                 | S5382                                | S3835                 | S5042                    | S2790                                | S1120                                       | S9002                              | S4866                           | S5900                                                       | S1691                      |
| D panthenol              | Ornidazole            | Formate                              | Loganin               | Bevantolol hydrochloride | Istradefylline                       | Everolimus (RAD001)                         | L-Fucose                           | Nicarbazin                      | Edrophonium chloride                                        | Praziquantel               |
| S4696                    | S3124                 | S5385                                | S3842                 | S5043                    | S2792                                | S1137                                       | S9003                              | S4867                           | S5901                                                       | S1692                      |
| Carbinoxamine Maleate    | Dexamethasone Acetate | Imidafenacin                         | Isoquercitrin         | Benorylate               | Torcetrapib                          | Malotilate                                  | (R)-(-)-Mandelic acid              | Propacetamol hydrochloride      | Canagliflozin hemihydrate                                   | Busulfan                   |
| S4697                    | S3129                 | S5388                                | S3843                 | S5046                    | S2794                                | S1144                                       | S9007                              | S4868                           | S5909                                                       | S1693                      |
| Saxagliptin hydrate      | Trimethoprim          | Betrixaban                           | Madecassoside         | Clonixin                 | Sofosbuvir (PSI-7977,                | Ivacaftor (VX-770)                          | 2'-Deoxyguanosine monohydrate      | Xanthinol Nicotinate            | Anagliptin                                                  | Carbamazepine              |

GS-7977)

|                   |                        |                                 |                                          |                                 |                            |                                                       |               |                                         |                                             |                   |
|-------------------|------------------------|---------------------------------|------------------------------------------|---------------------------------|----------------------------|-------------------------------------------------------|---------------|-----------------------------------------|---------------------------------------------|-------------------|
| S4698             | S3130                  | S5389                           | S3847                                    | S5049                           | S2807                      | S1148                                                 | S9032         | S4869                                   | S5911                                       | S1696             |
| Vitamin K1        | Biotin<br>(Vitamin B7) | Betrixaban<br>maleate           | Panaxatriol                              | Thiocolchic<br>oside            | Dabrafenib<br>(GSK2118436) | Docetaxel                                             | Sanguinarine  | Sulfamethoxazol<br>e sodium             | Bictegravir                                 | Hydrocortisone    |
| S4699             | S3132                  | S5392                           | S3849                                    | S5052                           | S2809                      | S1150                                                 | S9042         | S4870                                   | S5923                                       | S1701             |
| Etretinate        | Sulfamerazi<br>ne      | Mepivacaine                     | D-Galactose                              | Granisetron                     | MPEP                       | Paclitaxel                                            | Wedelolactone | Cefodizime<br>Sodium                    | Celiprolol<br>hydrochloride                 | Desonide          |
| S4701             | S3133                  | S5393                           | S3850                                    | S5054                           | S2814                      | S1156                                                 | S9046         | S4871                                   | S5924                                       | S1702             |
| 2-Deoxy-D-glucose | Sulfametha<br>zine     | Cyclofenil                      | Glucosamine<br>sulfate                   | Rifamycin<br>sodium salt        | Alpelisib<br>(BYL719)      | Capecitabine                                          | Berberine     | Pyridoxal<br>5-phosphate<br>monohydrate | Olanexidine<br>Hydrochloride<br>semihydrate | Didanosine        |
| S4706             | S3137                  | S5395                           | S3851                                    | S5055                           | S2830                      | S1164                                                 | S9063         | S4874                                   | S5925                                       | S1703             |
| Eugenol           | Sodium<br>salicylate   | Phenolphthal<br>ein             | Camphor                                  | Milbemycin<br>Oxime             | Clindamycin                | Lenvatinib<br>(E7080)                                 | Harringtonine | Cefazedone                              | Olodaterol<br>hydrochloride                 | Divalproex Sodium |
| S4707             | S3138                  | S5397                           | S3854                                    | S5056                           | S2832                      | S1168                                                 | S9140         | S4875                                   | S5926                                       | S1704             |
| Oleic Acid        | Methylthiou<br>racil   | Chlorhexidin<br>e               | Tetrahydropalm<br>atine<br>hydrochloride | Dinoprost<br>tromethami<br>ne   | Epiandrosterone            | Valproic acid<br>sodium salt<br>(Sodium<br>valproate) | Pulegone      | Cephapirin<br>Benzathine                | Pitolisant<br>hydrochloride                 | Emtricitabine     |
| S4709             | Empty                  | S5398                           | S3856                                    | S5058                           | S2840                      | S1178                                                 | S9141         | S4876                                   | S5927                                       | S1705             |
| Latanoprost       | Empty                  | Nefazodone<br>hydrochlorid<br>e | Allantoin                                | Revaprazan<br>Hydrochlori<br>de | Apalutamide?(A<br>RN-509)  | Regorafenib (BAY<br>73-4506)                          | Berbamine     | Robenidine<br>Hydrochoride              | Proguanil                                   | Progesterone      |
| S4711             | S3140                  | S5399                           | S3858                                    | S5059                           | S2851                      | S1183                                                 | S9142         | S4877                                   | S5935                                       | S1706             |

|                         | Chlorprothixene       |                           |              |                                | Baricitinib<br>(LY3009104,<br>INCB028050) | Danoprevir<br>(ITMN-191) | Sparteine                      | Eperisone<br>hydrochloride    | Alvimopan         | Lamivudine                   |
|-------------------------|-----------------------|---------------------------|--------------|--------------------------------|-------------------------------------------|--------------------------|--------------------------------|-------------------------------|-------------------|------------------------------|
| Esculetin               | Milnacipran<br>HCl    | ne<br>hydrochlorid<br>e   | Lawsone      | Pixantrone<br>Maleate          |                                           |                          |                                |                               |                   |                              |
| S4714                   | S3144                 | S5401                     | S3866        | S5060                          | S2853                                     | S1185                    | S9143                          | S4878                         | S5950             | S1709                        |
| (-)-Menthol             | Darifenacin<br>HBr    | Tegaserod<br>Maleate      | Galanthamine | Metadoxine                     | Carfilzomib<br>(PR-171)                   | Ritonavir                | Ammonium<br>Glycyrrhizate      | Neticonazole<br>Hydrochloride | Fingolimod        | Estradiol                    |
| S4716                   | S3147                 | S5402                     | S3868        | S5062                          | S2868                                     | S1188                    | S9193                          | S4880                         | S6003             | S1712                        |
| Evans Blue              | Entacapone            | Dasabuvir(AB<br>T-333)    | Harmine      | Daclatasvir<br>Digydrochloride | Alogliptin<br>(SYK-322)<br>benzoate       | Anastrozole              | Aristolochic acid A            | Cefathiamidine                | Ataluren (PTC124) | Deferasirox                  |
| S4717                   | S3149                 | S5403                     | S3872        | S5063                          | S2874                                     | S1189                    | S9212                          | S4881                         | S6006             | S1713                        |
| Isatin                  | Estradiol<br>valerate | Ombitasvir<br>(ABT-267)   | Guaiacol     | Trelagliptin<br>succinate      | Camostat<br>Mesilate                      | Aprepitant               | Melamine                       | Calcium<br>Dobesilate         | Imidazole         | Piroxicam                    |
| S4718                   | S3150                 | S5404                     | S3876        | S5065                          | S2875                                     | S1190                    | S9222                          | S4883                         | S6007             | S1714                        |
| Acetylcholine<br>iodide | Articaine<br>HCl      | Paritaprevir<br>(ABT-450) | Indigo       | Ganciclovir<br>sodium          | Prucalopride                              | Bicalutamide             | Dipotassium<br>glycyrrhizinate | Lynestrenol                   | Bisphenol A       | Gemcitabine                  |
| S4722                   | S3151                 | S5405                     | S3881        | S5066                          | S2884                                     | S1191                    | S9227                          | S4885                         | S6010             | S1715                        |
| (+)-Catechin            | Gliquidone            | Propylparaben             | Scopoletin   | Pramipexole<br>dihydrochloride | Acesulfame<br>Potassium                   | Fulvestrant              | Sinensetin                     | Taurolidine                   | Sodium L-lactate  | Glipizide                    |
| S4723                   | S3154                 | S5406                     | S3883        | S5067                          | S2900                                     | S1192                    | S9240                          | S4886                         | S6014             | S1716                        |
| (-)Epicatechin          | Butenafine<br>HCl     | Sultamicillin<br>Tosylate | Protopine    | Losartan                       | Cobicistat<br>(GS-9350)                   | Raltitrexed              | Isofraxidin                    | Menbutone                     | Isonicotinic acid | Glyburide<br>(Glibenclamide) |
| S4725                   | S3155                 | S5407                     | S3885        | S5069                          | S2902                                     | S1193                    | S9249                          | S4887                         | S6017             | S1717                        |

|                    |                       |                                  |                        |                        |                                        |             |                    |                           |                               |                    |
|--------------------|-----------------------|----------------------------------|------------------------|------------------------|----------------------------------------|-------------|--------------------|---------------------------|-------------------------------|--------------------|
| Benzenesulfonamide | Mepivacaine HCl       | Squalane                         | Pyrogallol             | Dabrafenib Mesylate    | S-Ruxolitinib (INCB018424)             | Thalidomide | Securinine         | Nikethamide               | p-Cresol                      | Fomepizole         |
| S4726              | S3160                 | S5408                            | S3887                  | S5070                  | S2903                                  | S1196       | S9263              | S4889                     | S6034                         | S1718              |
| Lauric Acid        | Ethynodiol diacetate  | Isoprene                         | L-Rhamnose monohydrate | Mupirocin calcium      | Lumiracoxib                            | Exemestane  | 3-n-Butylphthalide | Perospirone hydrochloride | p-Benzoquinone                | Adefovir Dipivoxil |
| S4727              | S3161                 | S5410                            | S3889                  | S5071                  | S2907                                  | S1197       | S9311              | S4890                     | S6035                         | S1719              |
| Cinnarizine        | Sertaconazole nitrate | Chloramphenicol sodium succinate | Arteether              | Duloxetine             | Pirfenidone                            | Finasteride | Germacrone         | Bifendate                 | 2-Naphthol                    | Zalcitabine        |
| S4731              | S3162                 | S5411                            | S3892                  | Empty                  | S2922                                  | S1199       | S9321              | S4893                     | S6041                         | S1721              |
| Perphenazine       | Tylosin tartrate      | Sultamicillin                    | Isoprosalen            | Empty                  | Icotinib                               | Cladribine  | Topotecan          | Cytosine                  | Dibutyl sebacate              | Azathioprine       |
| S4733              | S3163                 | S5413                            | S3893                  | S5073                  | S3000                                  | S1200       | S9326              | S4896                     | S6047                         | S1723              |
| Retigabine         | Benzotropine mesylate | Ertugliflozin                    | Bornyl acetate         | Donepezil              | Carbazochrome sodium sulfonate (AC-17) | Decitabine  | Scopolamine        | Elagolix Sodium           | Lactose                       | Indomethacin       |
| S4734              | S3167                 | S5414                            | S3895                  | S5074                  | S3001                                  | S1202       | S9327              | S4899                     | S6049                         | S1725              |
| Retigabine 2HCl    | Altrenogest           | Diflucortolone valerate          | Sophoridine            | Argatroban Monohydrate | Clevudine                              | Dutasteride | Carboprost         | Sulfogaiacol              | (+)-(S)-Carvone               | Terbinafine        |
| S4735              | S3170                 | Empty                            | S3898                  | S5075                  | S3002                                  | S1204       | S9329              | S4931                     | S6052                         | S1727              |
| Salvianolic acid B | Ampicillin sodium     | Empty                            | Hydroxy Camptothecine  | Acotiamide             | Rivaroxaban                            | Melatonin   | Orcinol            | Propiverine hydrochloride | Saccharin sodium salt hydrate | Levonorgestrel     |
| S4736              | S3172                 | S5416                            | S3899                  | S5076                  | S3003                                  | S1206       | S9338              | S4932                     | S6053                         | S1729              |



|                                           |                           |                            |                    |                            |                            |                                                 |                                  |                   |                               |                    |
|-------------------------------------------|---------------------------|----------------------------|--------------------|----------------------------|----------------------------|-------------------------------------------------|----------------------------------|-------------------|-------------------------------|--------------------|
| Trapidil                                  | Anagrelide<br>HCl         | Metyrapone                 | Hederagenin        | Xipamide                   | Prostaglandin<br>E2 (PGE2) | Bisoprolol<br>fumarate                          | Octyl gallate                    | Proxiphylline     | Phenylglyoxylic acid          | Gemfibrozil        |
| S4737                                     | S3173                     | S5418                      | S3901              | S5077                      | S3005                      | S1207                                           | S9346                            | Empty             | S6055                         | S1730              |
| Psoralen                                  | Antipyrine                | Parecoxib<br>Sodium        | Astragaloside IV   | Regorafenib<br>Monohydrate | Paroxetine HCl             | Tivozanib<br>(AV-951)                           | 1-Indanone                       |                   | (S)-(-)-Limonene              | Indapamide         |
| S4748                                     | S3175                     | S5419                      | S3909              | S5078                      | S3008                      | S1208                                           | S9349                            | S4935             | S6058                         | S1732              |
| Ondansetron<br>Hydrochloride<br>Dihydrate | Atomoxetine<br>HCl        | 1,4-Cineole                | Catalpol           | Osimertinib<br>mesylate    | Zaltoprofen                | Doxorubicin<br>(Adriamycin) HCl                 | D-(+)-Raffinose<br>pentahydrate  | Asunaprevir       | $\beta$ -Caryophyllene        | Mitotane           |
| S4749                                     | S3176                     | S5420                      | S3914              | S5079                      | S3012                      | S1209                                           | S9351                            | S4939             | S6067                         | S1733              |
| Citalopram HBr                            | Betahistine<br>2HCl       | Clindamycin<br>alcoholate  | $\alpha$ -Hederin  | Sitagliptin                | Pazopanib                  | Fluorouracil<br>(5-Fluoracil, 5-FU) monohydrate | 2'-Deoxyadenosine<br>monohydrate | cis-Aconitic acid | 2,4-dichlorobenzyl<br>alcohol | Methylprednisolone |
| S4750                                     | S3178                     | S5424                      | S3919              | S5081                      | S3015                      | S1210                                           | S9354                            | S4940             | S6068                         | S1734              |
| Sulfacetamide<br>sodium salt<br>hydrate   | Brinzolamide              | Carbaryl                   | Hederacoside C     | Ceforanide                 | Amoxicillin                | Methotrexate                                    | Oxalic acid                      | Maltol            | Doxycycline<br>monohydrate    | Meloxicam          |
| S4751                                     | S3179                     | S5428                      | S3921              | S5082                      | S3017                      | S1212                                           | S9368                            | S4949             | S6073                         | S1735              |
| Cisapride<br>hydrate                      | Carbenicillin<br>disodium | Promazine<br>hydrochloride | Lathyrol           | Vitamin K2                 | Aspirin                    | Bendamustine<br>HCl                             | ADP                              | Nonanoic acid     | Diclofenac acid               | Mesna              |
| S4752                                     | S3180                     | S5430                      | S3923              | S5083                      | S3018                      | S1223                                           | S9373                            | S4952             | S6079                         | S1736              |
| Corticosterone                            | Eletriptan<br>HBr         | Metoprolol                 | Ginsenoside<br>Rg1 | Lentinan                   | Niflumic acid              | Epirubicin HCl                                  | Neryl acetate                    | Fumaric acid      | 2-Methylhexanoic<br>acid      | Methocarbamol      |
| S4754                                     | S3181                     | S5435                      | S3924              | S5084                      | S3019                      | S1225                                           | S9380                            | S4953             | S6104                         | S1737              |

|                          |                        |                                            |                            |                    |                               |                              |                                |                  |                                       |                                       |
|--------------------------|------------------------|--------------------------------------------|----------------------------|--------------------|-------------------------------|------------------------------|--------------------------------|------------------|---------------------------------------|---------------------------------------|
| Betulin                  | Flumequine             | Quinacrine<br>Dihydrochloride<br>Dihydrate | Ginsenoside<br>Rb1         | Carbazochrome      | Ciclopirox<br>ethanolamine    | Etoposide                    | 5,7-Dihydroxy-4-methylcoumarin | Usnic acid       | (±)-α-Tocopherol                      | Prednisolone                          |
| S4757                    | S3183                  | S5440                                      | S3925                      | S5085              | S3021                         | S1227                        | S9382                          | S4957            | S6118                                 | S1738                                 |
| Dihydrotestosterone(DHT) | Amitriptyline HCl      | Berberine<br>Sulfate                       | (-)-Epicatechin<br>gallate | Azamethiphos       | Rimonabant                    | Raloxifene HCl               | Thymine                        | Linalool         | Terpinen-4-ol                         | Telmisartan                           |
| S4759                    | S3185                  | S5447                                      | S3926                      | S5086              | S3022                         | S1229                        | S9383                          | S4958            | S6121                                 | S1739                                 |
| p-Coumaric Acid          | Adrenalone<br>HCl      | Tripolidine<br>Hydrochloride               | Forsythine                 | p-Anisaldehyde     | Cabazitaxel                   | Fludarabine<br>Phosphate     | Methyl palmitate               | Glycocholic acid | Maltotriose                           | Thiabendazole                         |
| S4768                    | S3186                  | S5450                                      | S3927                      | S5087              | S3023                         | S1231                        | S9385                          | S4964            | S6172                                 | S1740                                 |
| Melibiose                | Azatadine<br>dimaleate | Sofalcone                                  | Swertiamarin               | Tianeptine         | Bufexamac                     | Topotecan HCl                | Ligustilide                    | Lactobionic acid | Brucine sulfate<br>heptahydrate       | Guaifenesin                           |
| S4769                    | S3188                  | S5452                                      | S3930                      | S5091              | S3024                         | S1233                        | S9400                          | S4971            | S6173                                 | S1741                                 |
| L-5-Hydroxytryptophan    | (+,-)-Octopamine HCl   | Sanguinarine<br>chloride                   | Liquiritin                 | Geranyl<br>acetate | Lamotrigine                   | 2-Methoxyestradiol (2-MeOE2) | Rhynchophylline                | Buparvaquone     | Amylmetacresol                        | Rifabutin                             |
| S4776                    | S3189                  | S5453                                      | S3935                      | S5092              | S3027                         | S1235                        | S9413                          | S4973            | S6188                                 | S1742                                 |
| Harmaline                | Ropinirole<br>HCl      | Hyperoside                                 | Nonivamide                 | Febantel           | Fenoprofen<br>calcium hydrate | Letrozole                    | Yangonin                       | Iminostilbene    | p-Toluenesulfonic<br>acid monohydrate | Nevirapine                            |
| S4779                    | S3193                  | S5454                                      | S3944                      | S5093              | S3031                         | S1237                        | S9451                          | S4975            | S6196                                 | S1743                                 |
| Menadiol<br>Diacetate    | Ticarcillin<br>sodium  | Saikosaponin<br>D                          | Valproic acid              | Rafoxanide         | Linagliptin                   | Temozolomide                 | Uridine<br>5'-monophosphate    | Fimasartan       | 4-Nitrophenol                         | NEXIUM<br>(esomeprazole<br>magnesium) |
| S4783                    | S3195                  | S5457                                      | S3945                      | S5096              | S3033                         | S1238                        | S9454                          | S4976            | S6197                                 | S1744                                 |

|                         |                        |                   |                |                         |                                |                        |                            |                   |                             |                      |
|-------------------------|------------------------|-------------------|----------------|-------------------------|--------------------------------|------------------------|----------------------------|-------------------|-----------------------------|----------------------|
| Benzyl isothiocyanate   | Azlocillin sodium salt | Curculigoside     | L-Cycloserine  | SulfadiMethoxine sodium | Vildagliptin (LAF-237)         | Tamoxifen              | Undecanoic acid            | Sulfalene(SMPZ)   | Dimethylamine hydrochloride | Nicotinic Acid       |
| S4792                   | S3199                  | S5459             | S3946          | Empty                   | S3035                          | S1241                  | S9457                      | S4977             | S6199                       | S1747                |
| N-Acetylneuraminic acid | Reboxetine mesylate    | Aucubin           | Mesterolone    | Empty                   | Daunorubicin HCl               | Vincristine sulfate    | Phensuximide               | Efonidipine       | o-Cresol                    | Nimodipine           |
| S4794                   | S3200                  | S5466             | Empty          | S5100                   | S3036                          | S1243                  | S9458                      | S4978             | S6202                       | S1748                |
| Drostanolone Propionate | Triflusal              | Saikosaponin A    | Empty          | Pralidoxime Iodide      | Pravastatin sodium             | Agomelatine            | Ergoloid Mesylates         | Azathramycin      | Butylated hydroxytoluene    | Nisoldipine          |
| S4795                   | S3201                  | S5473             | S3950          | S5102                   | S3037                          | S1247                  | S9459                      | S4980             | S6207                       | S1750                |
|                         |                        | Pivmecillinam     |                |                         |                                |                        |                            |                   |                             |                      |
| Trenbolone acetate      | Trifluoperazine 2HCl   | hydrochloride     | Maltitol       | Stachyose               | Bepotastine Besilate           | Leflunomide            | Mecamylamine Hydrochloride | Anamorelin        | Levulinic acid              | Octocrylene          |
| S4796                   | S3202                  | S5476             | S3951          | S5103                   | S3038                          | S1250                  | S9460                      | S4983             | S6210                       | S1754                |
| Methandrostenolone      | Catharanthine          | Rolapitant        | Tannic acid    | lutein                  | Fosaprepitant dimeglumine salt | Enzalutamide (MDV3100) | Ethotoin                   | Sorbic acid       | Ethanolamine hydrochloride  | Oxybutynin           |
| S4797                   | S3204                  | S5477             | S3957          | S5105                   | S3043                          | S1251                  | S9461                      | Empty             | S6211                       | S1756                |
| Nicergoline             | Meptazinol HCl         | Gefarnate         | Gamma-Oryzanol | Proanthocyanidins       | Rofecoxib                      | Dienogest              | Benzonate                  | Empty             | Furfural                    | Enoxacin             |
| S4800                   | S3207                  | S5478             | S3959          | S5106                   | S3045                          | S1252                  | Empty                      | S4988             | S6215                       | S1759                |
| Daminozide              | Iopromide              | Dantrolene sodium | (+)-Borneol    | Lanolin                 | Cinepazide maleate             | Entecavir Hydrate      | Empty                      | Tiamulin fumarate | Phthalic acid               | Pitavastatin Calcium |
| S4803                   | S3208                  | S5479             | S3965          | S5108                   | S3047                          | S1255                  | S9463                      | S4991             | S6217                       | S1760                |

|                    |                             |                            |                      |                |                      |                |                       |                                 |                       |                     |
|--------------------|-----------------------------|----------------------------|----------------------|----------------|----------------------|----------------|-----------------------|---------------------------------|-----------------------|---------------------|
| Thymidine          | Fexofenadine HCl            | Cloperastine hydrochloride | Vanillyl Butyl Ether | Tylosin        | Otilonium Bromide    | Nepafenac      | Demecarium Bromide    | Valpromide                      | o-Toluic acid         | Rifapentine         |
| S4812              | S3212                       | S5480                      | S3966                | S5109          | S3051                | S1256          | S9465                 | S4994                           | S6218                 | S1761               |
| Ceftizoxime        | Moclobemide (Ro 111163)     | Clidinium Bromide          | Nifuratel            | Ademetionine   | Bosentan Hydrate     | Rufinamide     | Methysergide Maleate  | Methylcobalamin                 | Sodium lauryl sulfate | Suprofen            |
| S4813              | S3604                       | S5481                      | S3967                | S5112          | S3052                | S1257          | S9466                 | S4996                           | S6221                 | S1762               |
| Cefuroxime axetil  | Triptolide (PG490)          | Molindone hydrochloride    | Flavone              | alpha-Arbutin  | Rupatadine Fumarate  | Posaconazole   | Methenamine Hippurate | Tavaborole (AN-2690)            | Methyl cinnamate      | Pyrazinamide        |
| S4815              | S3605                       | S5482                      | S3968                | S5113          | S3053                | S1258          | S9467                 | S4999                           | S6223                 | S1763               |
| L-Cysteine HCl     | Borneol                     | Prilocaine hydrochloride   | Histamine            | Propyl gallate | Azelnidipine         | Prasugrel      | Thiothixene           | Avermectin B1(Abamectin)        | Triethyl citrate      | Quetiapine Fumarate |
| S4816              | S3606                       | S5483                      | S3969                | S5114          | S3054                | S1259          | S9469                 | S5001                           | S6226                 | S1764               |
| Diatrizoate sodium | Fangchinoline               | Tribenzagan Hydrochloride  | Veratric acid        | Hydroquinone   | Alverine Citrate     | Ramelteon      | Haloperidol Decanoate | Tofacitinib (CP-690550) Citrate | 4-Methyl-2-pentano ne | Rifampin            |
| S4817              | S3609                       | S5484                      | S3970                | S5117          | S3057                | S1260          | S9470                 | S5002                           | S6231                 | S1768               |
| Atenolol           | Berbamine (dihydrochloride) | Rimantadine Hydrochloride  | Vindoline            | Doramectin     | Azilsartan Medoxomil | Cinacalcet HCl | Penbutolol Sulfate    | Fingolimod (FTY720) HCl         | Methyl nicotinate     | Cefditoren Pivoxil  |
| S4819              | S3611                       | S5485                      | S3971                | S5119          | S3060                | S1261          | S9472                 | S5003                           | S6233                 | S1770               |

---

|           |                   |                           |          |          |                  |           |               |                    |               |              |
|-----------|-------------------|---------------------------|----------|----------|------------------|-----------|---------------|--------------------|---------------|--------------|
| Saccharin | (+)-Fangchinoline | Desipramine Hydrochloride | Fusidine | Olivetol | Medetomidine HCl | Celecoxib | Oxtriphylline | Tacrolimus (FK506) | Tartaric acid | Sulfadiazine |
|-----------|-------------------|---------------------------|----------|----------|------------------|-----------|---------------|--------------------|---------------|--------------|

---

Empty means no drug in this hole.
